# Supplementary material
Source: PubMed Central journal article supplement (PMC10088473)
Supplement: NIHMS1885777-supplement-Supplementary_Tables.pdf [file NIHMS1885777-supplement-Supplementary_Tables.pdf]

**Supplementary Table I. Unadjusted associations between interquartile range increases in particulate matter with diameter of 2.5µm or less (PM<sub>2.5</sub>) and O<sub>3</sub> and implantation, pregnancy, and live birth, by time of exposure**

| Exposure period                                  | PM <sub>2.5</sub>                         |                                       |                                        | O <sub>3</sub>                            |                                       |                                        |
|--------------------------------------------------|-------------------------------------------|---------------------------------------|----------------------------------------|-------------------------------------------|---------------------------------------|----------------------------------------|
|                                                  | Implantation*<br>RR <sup>†</sup> (95% CI) | Pregnancy<br>RR <sup>†</sup> (95% CI) | Live birth<br>RR <sup>†</sup> (95% CI) | Implantation*<br>RR <sup>†</sup> (95% CI) | Pregnancy<br>RR <sup>†</sup> (95% CI) | Live birth<br>RR <sup>†</sup> (95% CI) |
| Cycle start to oocyte retrieval                  | 1.00 (0.98-1.01)                          | 1.00 (0.99-1.01)                      | 1.00 (0.99-1.01)                       | 1.02 (1.01-1.04)                          | 1.01 (1.01-1.02)                      | 1.02 (1.02-1.03)                       |
| Oocyte retrieval to embryo transfer <sup>§</sup> | 1.00 (0.98-1.01)                          | 1.00 (0.99-1.01)                      | 1.00 (0.99-1.01)                       | 1.02 (1.01-1.04)                          | 1.01 (1.01-1.02)                      | 1.02 (1.01-1.03)                       |
| Embryo transfer + 14 days <sup>§</sup>           | 1.00 (0.98-1.01)                          | 1.00 (0.99-1.01)                      | 1.00 (0.99-1.01)                       | 1.02 (1.01-1.04)                          | 1.01 (1.01-1.02)                      | 1.02 (1.01-1.03)                       |

Abbreviations: RR, adjusted risk ratio

\*Calculated as the number of embryos implanted divided by the total number of embryos transferred; if number of fetal heartbeats and number of live and stillborn infants was missing, then implantation rate was considered missing

<sup>§</sup>Restricted to cycles with transfer of 1 or more embryos

**Supplementary Table II. Associations between interquartile range increases in particulate matter with diameter of 2.5µm or less (PM<sub>2.5</sub>) and O<sub>3</sub> and implantation, pregnancy, and live birth, by time of exposure among first time IVF patients**

|                                                  | PM <sub>2.5</sub>                          |                                        |                                         | O <sub>3</sub>                             |                                        |                                         |
|--------------------------------------------------|--------------------------------------------|----------------------------------------|-----------------------------------------|--------------------------------------------|----------------------------------------|-----------------------------------------|
|                                                  | Implantation*<br>aRR <sup>†</sup> (95% CI) | Pregnancy<br>aRR <sup>†</sup> (95% CI) | Live birth<br>aRR <sup>†</sup> (95% CI) | Implantation*<br>aRR <sup>†</sup> (95% CI) | Pregnancy<br>aRR <sup>†</sup> (95% CI) | Live birth<br>aRR <sup>†</sup> (95% CI) |
| Cycle start to oocyte retrieval                  | 0.99 (0.98-1.00)                           | 1.00 (0.99-1.01)                       | 1.00 (0.96-1.02)                        | 1.01 (0.99-1.02)                           | 1.01 (1.00-1.02)                       | 1.01 (1.00-1.02)                        |
| Oocyte retrieval to embryo transfer <sup>§</sup> | 0.99 (0.98-1.01)                           | 1.00 (0.99-1.02)                       | 0.99 (0.99-1.00)                        | 1.01 (0.99-1.02)                           | 1.01 (1.00-1.02)                       | 1.01 (1.00-1.02)                        |
| Embryo transfer + 14 days <sup>§</sup>           | 0.99 (0.98-1.00)                           | 1.00 (0.99-1.00)                       | 1.00 (0.99-1.01)                        | 1.01 (1.00-1.02)                           | 1.01 (1.00-1.02)                       | 1.01 (1.00-1.02)                        |

Abbreviations: aRR, adjusted risk ratio

\*Calculated as the number of embryos implanted divided by the total number of embryos transferred; if number of fetal heartbeats and number of live and stillborn infants was missing, then implantation rate was considered missing

<sup>†</sup>Models included PM<sub>2.5</sub>, ozone, patient age, parity, infertility diagnosis, number of oocytes retrieved, season, urban vs rural county designation, and year and accounted for clustering by county and clinic

<sup>§</sup>Restricted to cycles with transfer of 1 or more embryos

**Supplementary Table III. Associations between interquartile range increases in particulate matter with diameter of 2.5µm or less (PM<sub>2.5</sub>) and O<sub>3</sub> and implantation, pregnancy, and live birth, by time of exposure among women <35 years**

| Exposure period                                  | PM <sub>2.5</sub>         |                           |                           | O <sub>3</sub>            |                           |                           |
|--------------------------------------------------|---------------------------|---------------------------|---------------------------|---------------------------|---------------------------|---------------------------|
|                                                  | Implantation*             | Pregnancy                 | Live birth                | Implantation*             | Pregnancy                 | Live birth                |
|                                                  | aRR <sup>†</sup> (95% CI) |
| Cycle start to oocyte retrieval                  | 1.00 (0.99-1.00)          | 1.00 (0.99-1.00)          | 1.00 (0.99-1.01)          | 1.01 (1.00-1.02)          | 1.01 (1.00-1.01)          | 1.01 (1.00-1.06)          |
| Oocyte retrieval to embryo transfer <sup>§</sup> | 1.00 (0.99-1.00)          | 1.00 (0.99-1.01)          | 1.00 (0.99-1.01)          | 1.01 (1.00-1.03)          | 1.01 (1.00-1.01)          | 1.01 (1.00-1.02)          |
| Embryo transfer + 14 days <sup>§</sup>           | 1.00 (0.99-1.00)          | 1.00 (0.99-1.00)          | 1.00 (0.99-1.00)          | 1.01 (1.00-1.02)          | 1.00 (1.00-1.01)          | 1.01 (1.00-1.02)          |

Abbreviations: aRR, adjusted risk ratio

\*Calculated as the number of embryos implanted divided by the total number of embryos transferred; if number of fetal heartbeats and number of live and stillborn infants was missing, then implantation rate was considered missing

<sup>†</sup>Models included PM<sub>2.5</sub>, ozone, patient age, parity, infertility diagnosis, number prior IVF cycles, number of oocytes retrieved, season, urban vs rural county designation, and year and accounted for clustering by county and clinic

<sup>§</sup>Restricted to cycles with transfer of 1 or more embryos

**Supplementary Table IV. Associations between interquartile range increases in particulate matter with diameter of 2.5µm or less (PM<sub>2.5</sub>), O<sub>3</sub>, NO<sub>2</sub>, and SO<sub>2</sub> and implantation\* by time of exposure**

| Exposure period                                  | PM <sub>2.5</sub>         | O <sub>3</sub>            | NO <sub>2</sub>           | SO <sub>2</sub>           |
|--------------------------------------------------|---------------------------|---------------------------|---------------------------|---------------------------|
|                                                  | aRR <sup>†</sup> (95% CI) |
| <i>Model 1</i>                                   |                           |                           |                           |                           |
| Cycle start to oocyte retrieval                  | 1.02 (1.00-1.03)          | 1.00 (0.99-1.02)          | 0.98 (0.96-1.00)          |                           |
| Oocyte retrieval to embryo transfer <sup>§</sup> | 1.02 (1.00-1.04)          | 1.01 (0.99-1.03)          | 0.96 (0.94-0.99)          |                           |
| Embryo transfer + 14 days <sup>§</sup>           | 1.01 (1.00-1.02)          | 1.00 (0.99-1.02)          | 0.96 (0.95-0.98)          |                           |
| <i>Model 2</i>                                   |                           |                           |                           |                           |
| Cycle start to oocyte retrieval                  | 1.01 (1.00-1.02)          | 1.00 (0.99-1.02)          |                           | 0.98 (0.96-0.99)          |
| Oocyte retrieval to embryo transfer <sup>§</sup> | 1.00 (0.99-1.03)          | 1.00 (0.99-1.02)          |                           | 0.97 (0.95-1.00)          |
| Embryo transfer + 14 days <sup>§</sup>           | 1.01 (0.99-1.02)          | 1.00 (0.99-1.02)          |                           | 0.97 (0.95-0.99)          |
| <i>Model 3</i>                                   |                           |                           |                           |                           |
| Cycle start to oocyte retrieval                  | 1.02 (1.00-1.03)          | 1.00 (0.99-1.02)          | 0.98 (0.96-1.00)          | 0.98 (0.96-1.00)          |
| Oocyte retrieval to embryo transfer <sup>§</sup> | 1.02 (1.00-1.03)          | 1.00 (0.99-1.03)          | 0.97 (0.94-0.99)          | 0.98 (0.94-0.99)          |
| Embryo transfer + 14 days <sup>§</sup>           | 1.01 (1.00-1.03)          | 1.00 (0.99-1.02)          | 0.97 (0.95-0.98)          | 0.98 (0.96-0.99 )         |

Abbreviations: aRR, adjusted risk ratio

\*Calculated as the number of embryos implanted divided by the total number of embryos transferred; if number of fetal heartbeats and number of live and stillborn infants was missing, then implantation rate was considered missing.

<sup>†</sup>Models included PM<sub>2.5</sub>, O<sub>3</sub>, NO<sub>2</sub>, SO<sub>2</sub>, patient age, parity, infertility diagnosis, number prior IVF cycles, number of oocytes retrieved, season, and year and accounted for clustering by county and clinic

<sup>§</sup>Restricted to cycles with transfer of 1 or more embryos

**Supplementary Table V. Associations between interquartile range increases in particulate matter with diameter of 2.5µm or less (PM<sub>2.5</sub>), O<sub>3</sub>, NO<sub>2</sub>, and SO<sub>2</sub> and pregnancy by time of exposure**

| Exposure period                                  | PM <sub>2.5</sub>         | O <sub>3</sub>            | NO <sub>2</sub>           | SO <sub>2</sub>           |
|--------------------------------------------------|---------------------------|---------------------------|---------------------------|---------------------------|
|                                                  | aRR <sup>†</sup> (95% CI) |
| <i>Model 1</i>                                   |                           |                           |                           |                           |
| Cycle start to oocyte retrieval                  | 1.02 (1.00-1.03)          | 1.00 (0.99-1.02)          | 0.99 (0.96-1.02)          |                           |
| Oocyte retrieval to embryo transfer <sup>§</sup> | 1.01 (1.00-1.02)          | 1.01 (0.99-1.03)          | 0.98 (0.96-1.01)          |                           |
| Embryo transfer + 14 days <sup>§</sup>           | 1.00 (1.00-1.02)          | 1.01 (1.00-1.02)          | 0.95 (0.96 -1.00)         |                           |
| <i>Model 2</i>                                   |                           |                           |                           |                           |
| Cycle start to oocyte retrieval                  | 1.02 (1.00-1.03)          | 1.00 (0.99-1.01)          |                           | 0.97 (0.95-0.98)          |
| Oocyte retrieval to embryo transfer <sup>§</sup> | 1.01 (1.00-1.02)          | 1.00 (0.99-1.02)          |                           | 0.97 (0.95-0.99)          |
| Embryo transfer + 14 days <sup>§</sup>           | 1.01 (1.00-1.02)          | 1.01 (1.00-1.02)          |                           | 0.97 (0.96-0.98)          |
| <i>Model 3</i>                                   |                           |                           |                           |                           |
| Cycle start to oocyte retrieval                  | 1.02 (1.00-1.03)          | 1.00 (0.99-1.01)          | 1.00 (0.98-1.02)          | 0.97 (0.95-0.99)          |
| Oocyte retrieval to embryo transfer <sup>§</sup> | 1.01 (1.00-1.02)          | 1.00 (0.99-1.02)          | 0.99 (0.97-1.01)          | 0.97 (0.95-1.00)          |
| Embryo transfer + 14 days <sup>§</sup>           | 1.01 (1.00-1.02)          | 1.01 (1.00-1.02)          | 0.99 (0.97-1.01)          | 0.97 (0.96-0.99)          |

Abbreviations: aRR, adjusted risk ratio;

<sup>†</sup>Models included PM<sub>2.5</sub>, O<sub>3</sub>, NO<sub>2</sub>, SO<sub>2</sub>, patient age, parity, infertility diagnosis, number prior IVF cycles, number of oocytes retrieved, season, and year and accounted for clustering by county and clinic

<sup>§</sup>Restricted to cycles with transfer of 1 or more embryos

**Supplemental Table VI. Associations between interquartile range increases in particulate matter with diameter of 2.5µm or less (PM<sub>2.5</sub>), O<sub>3</sub>, NO<sub>2</sub>, and SO<sub>2</sub> and live birth by time of exposure**

| Exposure period                                  | PM <sub>2.5</sub>         | O <sub>3</sub>            | NO <sub>2</sub>           | SO <sub>2</sub>           |
|--------------------------------------------------|---------------------------|---------------------------|---------------------------|---------------------------|
|                                                  | aRR <sup>†</sup> (95% CI) |
| <i>Model 1</i>                                   |                           |                           |                           |                           |
| Cycle start to oocyte retrieval                  | 1.02 (1.01-1.04)          | 1.01 (0.99-1.02)          | 0.98 (0.96-1.01)          |                           |
| Oocyte retrieval to embryo transfer <sup>§</sup> | 1.01 (1.00-1.02)          | 1.02 (1.00-1.03)          | 0.98 (0.95-1.00)          |                           |
| Embryo transfer + 14 days <sup>§</sup>           | 1.01 (1.00-1.02)          | 1.01 (0.99-1.02)          | 0.98 (0.96-1.00)          |                           |
| <i>Model 2</i>                                   |                           |                           |                           |                           |
| Cycle start to oocyte retrieval                  | 1.02 (1.01-1.03)          | 1.01 (0.99-1.02)          |                           | 0.97 (0.96-0.98)          |
| Oocyte retrieval to embryo transfer <sup>§</sup> | 1.01 (1.00-1.02)          | 1.01 (1.00-1.03)          |                           | 0.97 (0.95-0.99)          |
| Embryo transfer + 14 days <sup>§</sup>           | 1.01 (1.00-1.02)          | 1.02 (0.99-1.02)          |                           | 0.97 (0.96-0.99)          |
| <i>Model 3</i>                                   |                           |                           |                           |                           |
| Cycle start to oocyte retrieval                  | 1.01 (1.01-1.04)          | 1.00 (0.99-1.02)          | 0.99 (0.97-1.01)          | 0.97 (0.95-0.99)          |
| Oocyte retrieval to embryo transfer <sup>§</sup> | 1.01 (1.00-1.03)          | 1.01 (1.00-1.03)          | 0.98 (0.96-1.01)          | 0.98 (0.96-1.00)          |
| Embryo transfer + 14 days <sup>§</sup>           | 1.01 (1.00-1.02)          | 1.01 (0.99-1.02)          | 0.98 (0.97-1.00)          | 0.97 (0.96-0.99)          |

Abbreviations: aRR, adjusted risk ratio

<sup>†</sup>Models included PM<sub>2.5</sub>, O<sub>3</sub>, NO<sub>2</sub>, SO<sub>2</sub>, patient age, parity, infertility diagnosis, number prior IVF cycles, number of oocytes retrieved, season, and year and accounted for clustering by county and clinic

<sup>§</sup>Restricted to cycles with transfer of 1 or more embryos
